# Supplementary material
Source: MDPI journal article supplement (https://www.mdpi.com/2073-4360/7/9/1478)
Supplement: s1 [file s1]

## Supplementary Information

|                                                                                            |                                                                                                 |
|--------------------------------------------------------------------------------------------|-------------------------------------------------------------------------------------------------|
| License Number                                                                             | 3681020277141                                                                                   |
| License date                                                                               | Aug 02, 2015                                                                                    |
| Licensed Content Publisher                                                                 | John Wiley and Sons                                                                             |
| Licensed Content Publication                                                               | Journal of Molecular Recognition                                                                |
| Licensed Content Title                                                                     | Molecular imprinting science and technology: a survey of the literature for the years 2004–2011 |
| Licensed Content Author                                                                    | Michael J. Whitcombe, Nicole Kirsch, Ian A. Nicholls                                            |
| Licensed Content Date                                                                      | Mar 20, 2014                                                                                    |
| Licensed Content Pages                                                                     | 105                                                                                             |
| Type of use                                                                                | Journal/Magazine                                                                                |
| Requestor type                                                                             | University/Academic                                                                             |
| Is the reuse sponsored by or associated with a pharmaceutical or medical products company? | no                                                                                              |
| Format                                                                                     | Electronic                                                                                      |
| Portion                                                                                    | Figure/table                                                                                    |
| Number of figures/tables                                                                   | 1                                                                                               |
| Original Wiley figure/table number(s)                                                      | figure 2                                                                                        |
| Will you be translating?                                                                   | No                                                                                              |
| Circulation                                                                                | 1                                                                                               |
| Title of new article                                                                       | Reversible molecular adsorption based on multiple-point interaction by shrinkable gels          |
| Publication the new article is in                                                          | MDPI                                                                                            |
| Publisher of new article                                                                   | Polymers                                                                                        |
| Author of new article                                                                      | Guoqing Pan                                                                                     |
| Expected publication                                                                       | Dec 2015                                                                                        |

**Figure S1.** The license of reprinting figure from Reference 3. Copyright 2014, Wiley.

|                                   |                                                                                                                                                                                                          |
|-----------------------------------|----------------------------------------------------------------------------------------------------------------------------------------------------------------------------------------------------------|
| License Number                    | 3680911343156                                                                                                                                                                                            |
| License date                      | Aug 02, 2015                                                                                                                                                                                             |
| Licensed content publisher        | The American Association for the Advancement of Science                                                                                                                                                  |
| Licensed content publication      | Science                                                                                                                                                                                                  |
| Licensed content title            | Reversible Molecular Adsorption Based on Multiple-Point Interaction by Shrinkable Gels                                                                                                                   |
| Licensed content author           | Taro Oya, Takashi Enoki, Alexander Yu. Grosberg, Satoru Masamune, Takaharu Sakiyama, Yukikazu Takeoka, Kazunori Tanaka, Guoqiang Wang, Yasar Yilmaz, Michael S. Feld, Ramachandra Dasari, Toyochi Tanaka |
| Licensed content date             | Nov 19, 1999                                                                                                                                                                                             |
| Volume number                     | 286                                                                                                                                                                                                      |
| Issue number                      | 5444                                                                                                                                                                                                     |
| Type of Use                       | Journal                                                                                                                                                                                                  |
| Requestor type                    | Scientist/individual at a research institution                                                                                                                                                           |
| Format                            | Print and Electronic                                                                                                                                                                                     |
| Portion                           | Figure                                                                                                                                                                                                   |
| Number of figures/tables          | 1                                                                                                                                                                                                        |
| Order reference number            | None                                                                                                                                                                                                     |
| Title of new article              | Reversible molecular adsorption based on multiple-point interaction by shrinkable gels                                                                                                                   |
| Publication the new article is in | MDPI                                                                                                                                                                                                     |
| Publisher of new article          | Polymers                                                                                                                                                                                                 |

**Figure S2.** The license of reprinting figure from Reference 94. Copyright 1999, Science.

|                                                 |                                                                                                                                                                                                |
|-------------------------------------------------|------------------------------------------------------------------------------------------------------------------------------------------------------------------------------------------------|
| License Number                                  | 3680941485869                                                                                                                                                                                  |
| License date                                    | Aug 02, 2015                                                                                                                                                                                   |
| Licensed content publisher                      | Elsevier                                                                                                                                                                                       |
| Licensed content publication                    | Biosensors and Bioelectronics                                                                                                                                                                  |
| Licensed content title                          | An efficient approach to obtaining water-compatible and stimuli-responsive molecularly imprinted polymers by the facile surface-grafting of functional polymer brushes via RAFT polymerization |
| Licensed content author                         | Guoqing Pan,Ying Zhang,Xianzhi Guo,Chenxi Li,Huiqi Zhang                                                                                                                                       |
| Licensed content date                           | 15 November 2010                                                                                                                                                                               |
| Licensed content volume number                  | 26                                                                                                                                                                                             |
| Licensed content issue number                   | 3                                                                                                                                                                                              |
| Number of pages                                 | 7                                                                                                                                                                                              |
| Type of Use                                     | reuse in a journal/magazine                                                                                                                                                                    |
| Requestor type                                  | author of new work                                                                                                                                                                             |
| Portion                                         | figures/tables/illustrations                                                                                                                                                                   |
| Number of figures/tables/illustrations          | 1                                                                                                                                                                                              |
| Format                                          | electronic                                                                                                                                                                                     |
| Are you the author of this Elsevier article?    | Yes                                                                                                                                                                                            |
| Will you be translating?                        | No                                                                                                                                                                                             |
| Original figure numbers                         | Scheme 1                                                                                                                                                                                       |
| Title of the article                            | Reversible molecular adsorption based on multiple-point interaction by shrinkable gels                                                                                                         |
| Publication new article is in                   | MDPI                                                                                                                                                                                           |
| Publisher of the new article                    | Polymers                                                                                                                                                                                       |
| Author of new article                           | Guoqing Pan                                                                                                                                                                                    |
| Expected publication date                       | Dec 2015                                                                                                                                                                                       |
| Estimated size of new article (number of pages) | 10                                                                                                                                                                                             |
| Elsevier VAT number                             | GB 484 6377 12                                                                                                                                                                                 |

**Figure S3.** The license of reprinting figure from Reference 36. Copyright 2010, Elsevier.

|                                                                                            |                                                                                                    |
|--------------------------------------------------------------------------------------------|----------------------------------------------------------------------------------------------------|
| License Number                                                                             | 3681021332657                                                                                      |
| License date                                                                               | Aug 02, 2015                                                                                       |
| Licensed Content Publisher                                                                 | John Wiley and Sons                                                                                |
| Licensed Content Publication                                                               | Angewandte Chemie                                                                                  |
| Licensed Content Title                                                                     | Thermo-Responsive Hydrogel Layers Imprinted with RGDS Peptide: A System for Harvesting Cell Sheets |
| Licensed Content Author                                                                    | Guoqing Pan,Qianping Guo,Yue Ma,Huilin Yang,Bin Li                                                 |
| Licensed Content Date                                                                      | May 28, 2013                                                                                       |
| Licensed Content Pages                                                                     | 5                                                                                                  |
| Type of use                                                                                | Journal/Magazine                                                                                   |
| Requestor type                                                                             | University/Academic                                                                                |
| Is the reuse sponsored by or associated with a pharmaceutical or medical products company? | no                                                                                                 |
| Format                                                                                     | Electronic                                                                                         |
| Portion                                                                                    | Figure/table                                                                                       |
| Number of figures/tables                                                                   | 1                                                                                                  |
| Original Wiley figure/table number(s)                                                      | Scheme 1                                                                                           |
| Will you be translating?                                                                   | No                                                                                                 |
| Circulation                                                                                | 1                                                                                                  |
| Title of new article                                                                       | Reversible molecular adsorption based on multiple-point interaction by shrinkable gels             |
| Publication the new article is in                                                          | MDPI                                                                                               |
| Publisher of new article                                                                   | Polymers                                                                                           |
| Author of new article                                                                      | Guoqing Pan                                                                                        |
| Expected publication date of new article                                                   | Dec 2015                                                                                           |
| Estimated size of new article (pages)                                                      | 10                                                                                                 |

**Figure S4.** The license of reprinting figure from Reference 37. Copyright 2013, Wiley.

**PERMISSION/LICENSE IS GRANTED FOR YOUR ORDER AT NO CHARGE**

This type of permission/license, instead of the standard Terms & Conditions, is sent to you because no fee is being charged for your order. Please note the following:

- Permission is granted for your request in both print and electronic formats, and translations.
- If figures and/or tables were requested, they may be adapted or used in part.
- Please print this page for your records and send a copy of it to your publisher/graduate school.
- Appropriate credit for the requested material should be given as follows: "Reprinted (adapted) with permission from (COMPLETE REFERENCE CITATION). Copyright (YEAR) American Chemical Society." Insert appropriate information in place of the capitalized words.
- One-time permission is granted only for the use specified in your request. No additional uses are granted (such as derivative works or other editions). For any other uses, please submit a new request.

**Figure S5.** The license of reprinting figure from Reference 103. Copyright 2002, Royal Society of Chemistry.

|                                                                                            |                                                                                                               |
|--------------------------------------------------------------------------------------------|---------------------------------------------------------------------------------------------------------------|
| License Number                                                                             | 3681030597038                                                                                                 |
| License date                                                                               | Aug 02, 2015                                                                                                  |
| Licensed Content Publisher                                                                 | John Wiley and Sons                                                                                           |
| Licensed Content Publication                                                               | Advanced Materials                                                                                            |
| Licensed Content Title                                                                     | pH-Sensitive Water-Soluble Nanospheric Imprinted Hydrogels Prepared as Horseradish Peroxidase Mimetic Enzymes |
| Licensed Content Author                                                                    | Zhiyong Chen, Li Xu, Yuan Liang, Meiping Zhao                                                                 |
| Licensed Content Date                                                                      | Dec 28, 2009                                                                                                  |
| Licensed Content Pages                                                                     | 5                                                                                                             |
| Type of use                                                                                | Journal/Magazine                                                                                              |
| Requestor type                                                                             | University/Academic                                                                                           |
| Is the reuse sponsored by or associated with a pharmaceutical or medical products company? | no                                                                                                            |
| Format                                                                                     | Electronic                                                                                                    |
| Portion                                                                                    | Figure/table                                                                                                  |
| Number of figures/tables                                                                   | 1                                                                                                             |
| Original Wiley figure/table number(s)                                                      | Figure 3                                                                                                      |
| Will you be translating?                                                                   | No                                                                                                            |
| Circulation                                                                                | 1                                                                                                             |
| Title of new article                                                                       | Reversible molecular adsorption based on multiple-point interaction by shrinkable gels                        |
| Publication the new article is in                                                          | MDPI                                                                                                          |
| Publisher of new article                                                                   | Polymers                                                                                                      |
| Author of new article                                                                      | Guoqing Pan                                                                                                   |
| Expected publication date of new article                                                   | Dec 2015                                                                                                      |
| Estimated size of new                                                                      | 10                                                                                                            |

**Figure S6.** The license of reprinting figure from from Reference 64. Copyright 2010, Wiley.

|                                                                                                                                                                  |                     |                                                                             |                                                                                                          |
|------------------------------------------------------------------------------------------------------------------------------------------------------------------|---------------------|-----------------------------------------------------------------------------|----------------------------------------------------------------------------------------------------------|
|  <b>ACS Publications</b><br><small>Most Trusted. Most Cited. Most Read.</small> | <b>Title:</b>       | Synthesis and Photoresponsive Properties of a Molecularly Imprinted Polymer | Logged in as:<br>Guoqing Pan<br>Soochow University<br>Account #:<br>3000946282<br><a href="#">LOGOUT</a> |
|                                                                                                                                                                  | <b>Author:</b>      | Christophe Gomy, Andreea R. Schmitzer                                       |                                                                                                          |
|                                                                                                                                                                  | <b>Publication:</b> | Organic Letters                                                             |                                                                                                          |
|                                                                                                                                                                  | <b>Publisher:</b>   | American Chemical Society                                                   |                                                                                                          |
|                                                                                                                                                                  | <b>Date:</b>        | Sep 1, 2007                                                                 |                                                                                                          |
| Copyright © 2007, American Chemical Society                                                                                                                      |                     |                                                                             |                                                                                                          |

**PERMISSION/LICENSE IS GRANTED FOR YOUR ORDER AT NO CHARGE**

This type of permission/license, instead of the standard Terms & Conditions, is sent to you because no fee is being charged for your order. Please note the following:

- Permission is granted for your request in both print and electronic formats, and translations.
- If figures and/or tables were requested, they may be adapted or used in part.
- Please print this page for your records and send a copy of it to your publisher/graduate school.
- Appropriate credit for the requested material should be given as follows: "Reprinted (adapted) with permission from (COMPLETE REFERENCE CITATION). Copyright (YEAR) American Chemical Society." Insert appropriate information in place of the capitalized words.
- One-time permission is granted only for the use specified in your request. No additional uses are granted (such as derivative works or other editions). For any other uses, please submit a new request.

**Figure S7.** The license of reprinting figure from from 68. Copyright 2007, ACS.

|                                                                                                                                                                  |                     |                                                                              |                                                                                                                                                                                                                                                                                                   |
|------------------------------------------------------------------------------------------------------------------------------------------------------------------|---------------------|------------------------------------------------------------------------------|---------------------------------------------------------------------------------------------------------------------------------------------------------------------------------------------------------------------------------------------------------------------------------------------------|
|  <b>ACS Publications</b><br><small>Most Trusted. Most Cited. Most Read.</small> | <b>Title:</b>       | Macromolecular Amplification of Binding Response in Supramolecular Hydrogels | <div style="border: 1px solid black; padding: 5px;"> <a href="#">LOGIN</a><br/>         If you're a <a href="#">copyright.com</a> user, you can login to RightsLink using your copyright.com credentials. Already a <a href="#">RightsLink user</a> or want to <a href="#">learn more?</a> </div> |
|                                                                                                                                                                  | <b>Author:</b>      | Wei Bai, Nicholas A. Gariano, David A. Spivak                                |                                                                                                                                                                                                                                                                                                   |
|                                                                                                                                                                  | <b>Publication:</b> | Journal of the American Chemical Society                                     |                                                                                                                                                                                                                                                                                                   |
|                                                                                                                                                                  | <b>Publisher:</b>   | American Chemical Society                                                    |                                                                                                                                                                                                                                                                                                   |
|                                                                                                                                                                  | <b>Date:</b>        | May 1, 2013                                                                  |                                                                                                                                                                                                                                                                                                   |
| Copyright © 2013, American Chemical Society                                                                                                                      |                     |                                                                              |                                                                                                                                                                                                                                                                                                   |

**PERMISSION/LICENSE IS GRANTED FOR YOUR ORDER AT NO CHARGE**

This type of permission/license, instead of the standard Terms & Conditions, is sent to you because no fee is being charged for your order. Please note the following:

- Permission is granted for your request in both print and electronic formats, and translations.
- If figures and/or tables were requested, they may be adapted or used in part.
- Please print this page for your records and send a copy of it to your publisher/graduate school.
- Appropriate credit for the requested material should be given as follows: "Reprinted (adapted) with permission from (COMPLETE REFERENCE CITATION). Copyright (YEAR) American Chemical Society." Insert appropriate information in place of the capitalized words.
- One-time permission is granted only for the use specified in your request. No additional uses are granted (such as derivative works or other editions). For any other uses, please submit a new request.

**Figure S8.** The license of reprinting figure from Reference 86. Copyright 2013, ACS.

|                                                                                            |                                                                                                                                                                    |
|--------------------------------------------------------------------------------------------|--------------------------------------------------------------------------------------------------------------------------------------------------------------------|
| License Number                                                                             | 3681031224665                                                                                                                                                      |
| License date                                                                               | Aug 02, 2015                                                                                                                                                       |
| Licensed Content Publisher                                                                 | John Wiley and Sons                                                                                                                                                |
| Licensed Content Publication                                                               | Advanced Materials                                                                                                                                                 |
| Licensed Content Title                                                                     | Rational Design of Synthetic Nanoparticles with a Large Reversible Shift of Acid Dissociation Constants: Proton Imprinting in Stimuli Responsive Nanogel Particles |
| Licensed Content Author                                                                    | Yu Hoshino,Ryohei C. Ohashi,Yoshiko Miura                                                                                                                          |
| Licensed Content Date                                                                      | Mar 17, 2014                                                                                                                                                       |
| Licensed Content Pages                                                                     | 6                                                                                                                                                                  |
| Type of use                                                                                | Journal/Magazine                                                                                                                                                   |
| Requestor type                                                                             | University/Academic                                                                                                                                                |
| Is the reuse sponsored by or associated with a pharmaceutical or medical products company? | no                                                                                                                                                                 |
| Format                                                                                     | Electronic                                                                                                                                                         |
| Portion                                                                                    | Figure/table                                                                                                                                                       |
| Number of figures/tables                                                                   | 1                                                                                                                                                                  |
| Original Wiley figure/table number(s)                                                      | Scheme 1                                                                                                                                                           |
| Will you be translating?                                                                   | No                                                                                                                                                                 |
| Circulation                                                                                | 1                                                                                                                                                                  |
| Title of new article                                                                       | Reversible molecular adsorption based on multiple-point interaction by shrinkable gels                                                                             |
| Publication the new article is in                                                          | MDPI                                                                                                                                                               |
| Publisher of new article                                                                   | Polymers                                                                                                                                                           |
| Author of new article                                                                      | Guoqing Pan                                                                                                                                                        |
| Expected publication                                                                       | Dec 2015                                                                                                                                                           |

**Figure S9.** The license of reprinting figure from Reference 89. Copyright 2014, Wiley.

© 2015 by the authors; licensee MDPI, Basel, Switzerland. This article is an open access article distributed under the terms and conditions of the Creative Commons Attribution license (<http://creativecommons.org/licenses/by/4.0/>).
